# Supplementary material
Source: PubMed Central journal article supplement (PMC5077193)
Supplement: 10.1074_M116.746297_jbc.M116.746297-1.pdf [file 10.1074_M116.746297_jbc.M116.746297-1.pdf]

Crystal Structure of a Complete Nonribosomal Peptide Synthetase Module Bound to Auxilliary MbtH-like Proteins

**Bradley R. Miller<sup>1,2</sup>, Eric J. Drake<sup>1,2</sup>, Ce Shi<sup>3</sup>, Courtney C. Aldrich<sup>3</sup>, and Andrew M. Gulick<sup>1,2</sup>**

<sup>1,2</sup>Hauptman-Woodward Medical Research Institute, and Department of Structural Biology, University at Buffalo, Buffalo, NY 14203 USA

<sup>3</sup>Center for Drug Design and Department of Medicinal Chemistry, University of Minnesota, Minneapolis MN 55455 USA

Running Title: *Structure of EntF bound to MbtH-Like Proteins*

Address correspondence to Andrew M. Gulick, Hauptman-Woodward Institute, 700 Ellicott St. Buffalo, NY 14203-1102, Phone (716) 898-8619, FAX (716) 898-8660 email, gulick@hwi.buffalo.edu

Supporting Information

|                                                                                       |    |
|---------------------------------------------------------------------------------------|----|
| Figure S1. Identity of the insertion residue frequency in adenylation domains .....   | S2 |
| Table S1. List of MLPs that have been biochemically analyzed for MLP dependence ..... | S3 |
| Table S3. Sequences and domain boundaries of constructs used herein .....             | S4 |
| Supplementary References .....                                                        | S5 |

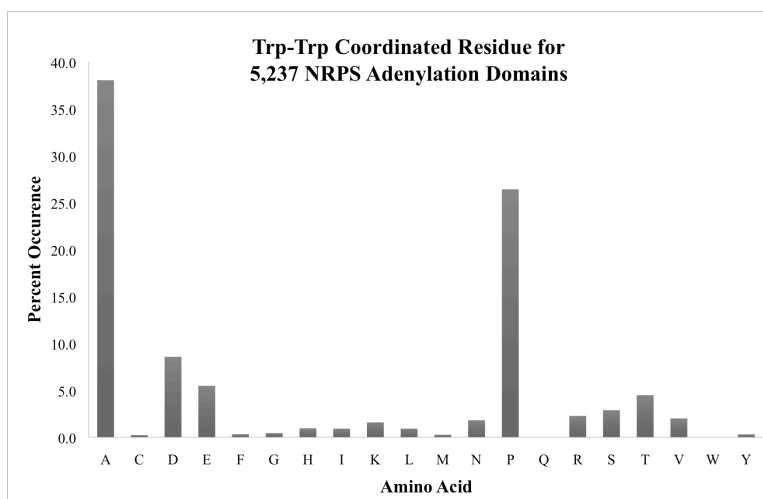

**Figure S1.** Identity of the “insertion residue” in the adenylation domains. A database of over 5200 adenylation domains sequences was analyzed and the residue that aligns with Ala826 of EntF was identified. The most common residues at this position are alanine and proline, which together are present in 66% of the sequences. The next two highest residues are glutamate and aspartate, which combined to fill 15% of the sequences. The other 16 amino acid residues account for the remaining 21% of the sequences at this site.

**Table S1.** MLPs that have been biochemically analyzed for MLP dependence

| Adenylation Domain              | MLP                 | Organism                                 | Natural Product | Effect                    | Publication                        |
|---------------------------------|---------------------|------------------------------------------|-----------------|---------------------------|------------------------------------|
| <b>CmnA-M1A</b>                 | CmnN                | <i>Saccharothrix mutabilis</i>           | Capreomycin     | Activity                  | (1)                                |
| <b>CmnA-M2A</b>                 | CmnN                | <i>Saccharothrix mutabilis</i>           | Capreomycin     | Activity                  | (1)                                |
| <b>CmnO</b>                     | CmnN                | <i>Saccharothrix mutabilis</i>           | Capreomycin     | Activity                  | (1)                                |
| <b>NikP1</b>                    | NikP1 <sup>3</sup>  | <i>Streptomyces tendae</i>               | Nikkomycin      | Activity                  | (2)                                |
| <b>NocA-M1A</b>                 | NocI                | <i>Nocardia uniformis</i>                | Nocardicin      | Activity                  | (3)                                |
| <b>NocB-M1A</b>                 | NocI                | <i>Nocardia uniformis</i>                | Nocardicin      | Activity                  | (3)                                |
| <b>PacL</b>                     | PacJ                | <i>Streptomyces coeruleorubidus</i>      | Pacidamycin 3   | Activity                  | (4,5)                              |
| <b>Pcza361.18</b>               | Orf1                | <i>Amycolatopsis orientalis</i>          | Vancomycin      | Activity                  | (6)                                |
| <b>PvdL-M2A</b>                 | PA2412 <sup>1</sup> | <i>Pseudomonas aeruginosa</i>            | Pyoverdine      | Activity                  | M.G. Thomas ( <i>pers. comm.</i> ) |
| <b>SimH</b>                     | SimY                | <i>Streptomyces antibioticus</i>         | Simocyclinone   | Activity                  | (6)                                |
| <b>SlgN1<sup>1</sup></b>        | SlgN1 <sup>3</sup>  | <i>Streptomyces lydicus</i>              | Streptolydigin  | Activity                  | (7)                                |
| <b>VbsS</b>                     | VbsG                | <i>Rhizobium etli</i>                    | Vicibactin      | Activity                  | (8)                                |
| <b>VioO</b>                     | VioN                | <i>Streptomyces</i> sp. ATCC-11861       | Viomycin        | Activity                  | (1)                                |
| <b>EntF<sup>1</sup></b>         | YbdZ <sup>1</sup>   | <i>Escherichia coli</i>                  | Enterobactin    | Enhanced                  | (1)                                |
| <b>NovH</b>                     | No MLP in Operon    | <i>Streptomyces spheroides</i>           | Novobiocin      | Enhanced                  | (6)                                |
| <b>Cgc18</b>                    | SAMR0548            | <i>Streptomyces ambofaciens</i>          | Congocidine     | Solubility                | (9)                                |
| <b>CloH</b>                     | CloY                | <i>Streptomyces roseochromogenes</i>     | Clorobiocin     | Solubility                | (6)                                |
| <b>GlbF</b>                     | GlbE                | <i>Burkholderia K481-B101</i>            | Glidobactin A   | Solubility                | (10)                               |
| <b>KtzH<sup>2</sup></b>         | KtzJ                | <i>Kutzneria sp 744</i>                  | Kutznerides     | Solubility                | (11)                               |
| <b>TioK</b>                     | TioT                | <i>Micromonospora</i> sp.                | Thiocoraline    | Solubility                | (12)                               |
| <b>TioN<sup>2</sup></b>         | TioT                | <i>Micromonospora</i> sp.                | Thiocoraline    | Solubility                | (13)                               |
| <b>ABBFA_003403<sup>1</sup></b> | -                   | <i>Acinetobacter baumannii</i>           | Unknown         | Not Required <sup>4</sup> | (14)                               |
| <b>CmnF</b>                     | -                   | <i>Saccharothrix mutabilis capreolus</i> | Capreomycin     | No Effect                 | (1)                                |
| <b>CmnG</b>                     | -                   | <i>Saccharothrix mutabilis capreolus</i> | Capreomycin     | No Effect                 | (1)                                |
| <b>EntE<sup>1</sup></b>         | -                   | <i>Escherichia coli</i>                  | Enterobactin    | No Effect                 | (1)                                |
| <b>PA1221<sup>1</sup></b>       | -                   | <i>Pseudomonas aeruginosa</i>            | Unknown         | No Effect                 | (15)                               |
| <b>PheA<sup>1</sup></b>         | -                   | <i>Bacillus brevis</i>                   | Gramicidin S    | Not Required <sup>4</sup> | (16)                               |

<sup>1</sup>Structure known<sup>2</sup>Internal methylation domain within the adenylation domain<sup>3</sup>MLP is attached with Adenylation domain as a single polypeptide<sup>4</sup>No MLP in the genome of this organism has been identified

**Table S2.** Sequences and domain boundaries of constructs used herein.

| <b>Protein</b> | <b>Organism</b>                                | <b>GI</b> | <b>Accession</b> | <b>Construct</b>     | <b>Start Residue</b> | <b>Stop Residue</b> |
|----------------|------------------------------------------------|-----------|------------------|----------------------|----------------------|---------------------|
| EntF           | <i>Escherichia coli</i> (K-12<br>subst W3110)  | 85674707  | BAE76341.1       | Wild Type            | 1                    | 1293                |
| NikP1          | <i>Streptomyces tendae</i>                     | 10639825  | CAC11137.1       | Wild Type            | 1                    | 677                 |
|                |                                                |           |                  | Adenylation - PCP    | 76                   | 677                 |
|                |                                                |           |                  | P449A                | 1                    | 677                 |
|                |                                                |           |                  | MLP alone            | 1                    | 75                  |
| PvdL           | <i>Pseudomonas aeruginosa</i> PAO1             | 9948469   | AAG05812.1       | Module 2 Adenylation | 1107                 | 1631                |
| YbdZ           | <i>Escherichia coli</i> (K-12<br>substr W3110) | 85674706  | BAE76340.1       | Wild Type            | 1                    | 72                  |
| PA2412         | <i>Pseudomonas aeruginosa</i> PAO1             | 15597608  | NP_251102.1      | Wild Type            | 1                    | 72                  |

### Supplementary References

1. Felnagle, E. A., Barkei, J. J., Park, H., Podevels, A. M., McMahon, M. D., Drott, D. W., and Thomas, M. G. (2010) MbtH-like proteins as integral components of bacterial nonribosomal peptide synthetases. *Biochemistry* **49**, 8815-8817
2. Chen, H., Hubbard, B. K., O'Connor, S. E., and Walsh, C. T. (2002) Formation of beta-hydroxy histidine in the biosynthesis of nikkomycin antibiotics. *Chem Biol* **9**, 103-112
3. Davidsen, J. M., Bartley, D. M., and Townsend, C. A. (2013) Non-ribosomal propeptide precursor in nocardicin A biosynthesis predicted from adenylation domain specificity dependent on the MbtH family protein NoI. *J Am Chem Soc* **135**, 1749-1759
4. Zhang, W., Heemstra, J. R., Jr., Walsh, C. T., and Imker, H. J. (2010) Activation of the pacidamycin PacL adenylation domain by MbtH-like proteins. *Biochemistry* **49**, 9946-9947
5. Zhang, W., Ostash, B., and Walsh, C. T. (2010) Identification of the biosynthetic gene cluster for the pacidamycin group of peptidyl nucleoside antibiotics. *Proc Natl Acad Sci U S A* **107**, 16828-16833
6. Boll, B., Taubitz, T., and Heide, L. (2011) Role of MbtH-like proteins in the adenylation of tyrosine during aminocoumarin and vancomycin biosynthesis. *J Biol Chem* **286**, 36281-36290
7. Herbst, D. A., Boll, B., Zocher, G., Stehle, T., and Heide, L. (2013) Structural Basis of the Interaction of MbtH-like Proteins, Putative Regulators of Nonribosomal Peptide Biosynthesis, with Adenylating Enzymes. *Journal of Biological Chemistry* **288**, 1991-2003
8. Heemstra, J. R., Jr., Walsh, C. T., and Sattely, E. S. (2009) Enzymatic tailoring of ornithine in the biosynthesis of the Rhizobium cyclic trihydroxamate siderophore vicibactin. *J Am Chem Soc* **131**, 15317-15329
9. Al-Mestarihi, A. H., Garzan, A., Kim, J. M., and Garneau-Tsodikova, S. (2015) Enzymatic Evidence for a Revised Congocidine Biosynthetic Pathway. *Chembiochem* **16**, 1307-1313
10. Imker, H. J., Krahn, D., Clerc, J., Kaiser, M., and Walsh, C. T. (2010) N-acylation during glidobactin biosynthesis by the tridomain nonribosomal peptide synthetase module GlbF. *Chem Biol* **17**, 1077-1083
11. Zolova, O. E., and Garneau-Tsodikova, S. (2014) KtzJ-dependent serine activation and O-methylation by KtzH for kutznerides biosynthesis. *J Antibiot (Tokyo)* **67**, 59-64
12. Mady, A. S., Zolova, O. E., Millan, M. A., Villamizar, G., de la Calle, F., Lombo, F., and Garneau-Tsodikova, S. (2011) Characterization of TioQ, a type II thioesterase from the thiocoraline biosynthetic cluster. *Mol Biosyst* **7**, 1999-2011
13. Al-Mestarihi, A. H., Villamizar, G., Fernandez, J., Zolova, O. E., Lombo, F., and Garneau-Tsodikova, S. (2014) Adenylation and S-methylation of cysteine by the bifunctional enzyme TioN in thiocoraline biosynthesis. *J Am Chem Soc* **136**, 17350-17354
14. Drake, E. J., Miller, B. R., Shi, C., Tarrasch, J. T., Sundlov, J. A., Allen, C. L., Skiniotis, G., Aldrich, C. C., and Gulick, A. M. (2016) Structures of two distinct conformations of holo-non-ribosomal peptide synthetases. *Nature* **529**, 235-238
15. Mitchell, C. A., Shi, C., Aldrich, C. C., and Gulick, A. M. (2012) Structure of PA1221, a Nonribosomal Peptide Synthetase Containing Adenylation and Peptidyl Carrier Protein Domains. *Biochemistry* **51**, 3252-3263
16. Conti, E., Stachelhaus, T., Marahiel, M. A., and Brick, P. (1997) Structural basis for the activation of phenylalanine in the non-ribosomal biosynthesis of gramicidin S. *Embo Journal* **16**, 4174-4183
